# Supplementary material for: Characterization of mesenchymal stem cells in pre-B acute lymphoblastic leukemia
Source: Front Cell Dev Biol. 2023 Jan 20;11:1005494. doi: 10.3389/fcell.2023.1005494 (PMC9897315; doi:10.3389/fcell.2023.1005494)
Supplement: Supplementary file 1 [file Table2.XLSX]

## Sheet: Sheet1
Table 2. Genes downregulated in L-MSCs. Presented in order of significance.
Gene ID	Gene Symbol	log2 (L-MSCs / Control MSCs)	Qvalue (L-MSCs / Control MSCs)	L-MSC_1 FPKM	L-MSC_2 FPKM	Control MSC_1 FPKM	Control MSC_2 FPKM	L-MSCs Average FPKM	Control MSCs Average FPKM
12904	'Crabp2'	-3.67087	5e-35	19.77	18.69	260.37	189.32	19.23	224.845
70747	'Tspan2'	-2.7623	2.06e-25	6.13	6.66	36.66	43.9	6.395	40.28
12709	'Ckb'	-2.33894	1.68e-22	64.49	71.9	283.09	354.86	68.195	318.975
100689	'Spon2'	-3.82586	1.06e-18	17.83	23.08	404.43	133.05	20.455	268.74
110257	'Hba-a2'	-5.60541	1.63e-18	1.06	1.8	72.4	47.86	1.43	60.13
16905	'Lmna'	-1.77572	7.38e-18	302.08	292.63	860.69	938.62	297.355	899.655
74488	'Lrrc15'	-2.52449	8.1e-18	3.31	3.98	19.34	19.53	3.645	19.435
12925	'Crip1'	-2.4092	1.29e-17	1925.12	3383.15	12248.5	12961.4	2654.14	12605
11595	'Acan'	-2.27878	2.5e-17	5.28	5.18	26	21.11	5.23	23.555
19227	'Pthlh'	-2.275	2.94e-17	22.34	25.67	108.53	105.9	24.005	107.215
15122	'Hba-a1'	-4.70244	1.94e-15	5.18	2.35	113.44	63.9	3.765	88.67
30060	'Meltf'	-2.49521	3.55e-15	4.61	5.44	29.96	22.5	5.025	26.23
67971	'Tppp3'	-3.1237	2.23e-14	131.19	394.3	1925.67	2280.65	262.745	2103.16
403395	'Clec3a'	-2.58807	6.24e-14	63.02	140.86	547.59	582.87	101.94	565.23
11826	'Aqp1'	-1.7475	1.65e-12	169.96	234.38	586.12	670.39	202.17	628.255
18452	'P4ha2'	-1.74661	2.62e-12	32.9	34.06	109.38	98.73	33.48	104.055
14199	'Fhl1'	-1.70818	1.73e-11	263.1	374.3	1022.48	918.31	318.7	970.395
57277	'Slurp1'	-2.94033	1.87e-11	32.13	87.21	402.76	418.39	59.67	410.575
231633	'Tmem119'	-2.38665	1.87e-11	23.8	49.12	190.73	160.4	36.46	175.565
56312	'Nupr1'	-1.92921	4.81e-11	708.18	804.76	3197.26	2027.56	756.47	2612.41
12306	'Anxa2'	-1.76302	4.81e-11	508.25	755.07	1779.06	2182.77	631.66	1980.91
50918	'Myadm'	-1.85691	5.26e-11	125.22	185.13	439.64	594.14	155.175	516.89
100503605	'Hbb-bs'	-4.29323	5.34e-11	2.11	2.04	44.61	29.41	2.075	37.01
100302688	'Gm17455'	-2.11495	5.37e-11	27.6	31.22	124.73	108.15	29.41	116.44
13732	'Emp3'	-1.6834	1.39e-10	344.19	463.76	1290.24	1077.49	403.975	1183.87
27528	'Nrep'	-2.70242	3.32e-10	17.06	50.49	194.71	210.29	33.775	202.5
22235	'Ugdh'	-1.40441	7.67e-10	105.83	111.82	276.67	254.23	108.825	265.45
12835	'Col6a3'	-1.60221	7.8e-10	39.37	57.02	133.38	145.33	48.195	139.355
16852	'Lgals1'	-1.42678	8.72e-10	670.99	839.03	1883.87	1831.86	755.01	1857.87
80884	'Maged2'	-1.68336	2.05e-09	26.65	31.23	93.81	78.17	28.94	85.99
109648	'Npy'	-2.32748	2.44e-09	84.22	195.21	652.6	610.12	139.715	631.36
545260	'Arsi'	-2.46088	2.84e-09	2.78	4.85	20.62	18.27	3.815	19.445
55984	'Camkk1'	-2.40903	2.86e-09	4.28	8.7	28.5	35.42	6.49	31.96
16835	'Ldlr'	-1.91513	3.37e-09	5.3	5.02	16.36	19.82	5.16	18.09
74145	'F13a1'	-1.70163	3.85e-09	18.27	24.11	71.23	56.33	21.19	63.78
16323	'Inhba'	-2.00533	5.47e-09	5.47	4.86	24	15.29	5.165	19.645
14118	'Fbn1'	-1.54109	7.4e-09	15.24	21.58	49.56	49.75	18.41	49.655
12834	'Col6a2'	-1.65553	8.33e-09	185.07	289.77	624.86	811.52	237.42	718.19
319554	'Idi1'	-2.60294	8.58e-09	2.7	2.68	18.64	11.63	2.69	15.135
68337	'Crip2'	-1.26245	8.58e-09	646.33	738.67	1514.64	1572.78	692.5	1543.71
68509	'Ptx4'	-2.6369	9.75e-09	6.14	5.04	23.71	40.83	5.59	32.27
12313	'Calm1'	-1.57879	1.02e-08	82.73	80.05	267.26	183.74	81.39	225.5
18301	'Fxyd5'	-1.72224	1.46e-08	268.49	440.33	1184.93	954.09	354.41	1069.51
81799	'C1qtnf3'	-2.40441	1.58e-08	11.15	28.99	103.47	91.14	20.07	97.305
246228	'Vwa1'	-1.49766	2.35e-08	25.63	29.69	77.81	71.34	27.66	74.575
23956	'Neu2'	-10.3965	3.35e-08	0	0	6.55	5.69	0	6.12
16534	'Kcnn4'	-2.54303	3.96e-08	4.43	9.08	28.8	43.37	6.755	36.085
72713	'Angptl1'	-1.7072	7.58e-08	49.7	82.66	177.13	221.99	66.18	199.56
30794	'Pdlim4'	-1.43328	8.59e-08	75.12	78.52	175.14	207.23	76.82	191.185
13003	'Vcan'	-1.90154	1.13e-07	12.19	18.93	41.77	68.55	15.56	55.16
27279	'Tnfrsf12a'	-1.60341	1.41e-07	59.19	49.61	145.54	154.8	54.4	150.17
11636	'Ak1'	-1.28666	2.47e-07	63.69	73.68	154.17	156.16	68.685	155.165
20194	'S100a10'	-1.36432	2.48e-07	1012.26	1434.09	2635.08	3109.5	1223.17	2872.29
68567	'Cgref1'	-2.01254	4.02e-07	13.25	22.38	70.29	59.93	17.815	65.11
67895	'Ppa1'	-1.60119	4.3e-07	25.65	26.54	68.67	77.56	26.095	73.115
21346	'Tagln2'	-1.41708	4.65e-07	173.85	175.66	350.16	513.77	174.755	431.965
216558	'Ugp2'	-1.29799	5.53e-07	34.09	32.86	75.61	75.02	33.475	75.315
211577	'Mrgprf'	-1.91127	5.66e-07	23.78	47.35	104.3	142.42	35.565	123.36
20897	'Stra6'	-2.48781	5.73e-07	4.79	3.1	27.06	14.19	3.945	20.625
14314	'Fstl1'	-1.23238	7.16e-07	274.57	356.49	641.28	732.74	315.53	687.01
74442	'Sgms2'	-1.31395	7.34e-07	19.89	21.58	49.63	42.89	20.735	46.26
21923	'Tnc'	-1.7708	9.65e-07	11.95	23.25	48.38	67.4	17.6	57.89
26360	'Angptl2'	-1.72658	1.15e-06	77.37	109.86	198.86	375.58	93.615	287.22
71738	'Mamdc2'	-1.29385	1.28e-06	25.29	29.73	60.6	64.3	27.51	62.45
12833	'Col6a1'	-1.4256	1.3e-06	361.04	583.2	1081.51	1265.92	472.12	1173.71
54325	'Elovl1'	-1.30057	1.37e-06	45.77	56.57	116.22	125.25	51.17	120.735
17700	'Mstn'	-2.19013	1.41e-06	7.79	20.55	53.91	65.17	14.17	59.54
12778	'Ackr3'	-1.1883	1.45e-06	154.5	180.34	376.07	330.51	167.42	353.29
16828	'Ldha'	-1.09282	1.52e-06	363.63	406.37	749.98	771.35	385	760.665
114584	'Clic1'	-1.20043	1.57e-06	178.02	216.17	404.64	429.68	197.095	417.16
14299	'Ncs1'	-1.39734	1.81e-06	12.01	11.49	29.24	28.26	11.75	28.75
67888	'Tmem100'	-1.35143	1.85e-06	71.45	98.21	203.07	191.21	84.83	197.14
100039257	'Tmem254b'	-1.18729	2.38e-06	99.27	100.84	202.78	220.6	100.055	211.69
67267	'Uqcc2'	-1.49905	2.6e-06	122.83	135.03	348.08	307.51	128.93	327.795
80879	'Slc16a3'	-1.74676	2.8e-06	15.89	17.36	64.47	38.77	16.625	51.62
110196	'Fdps'	-1.70119	2.8e-06	25.35	20.8	76.97	60.56	23.075	68.765
72324	'Plxdc1'	-1.38863	2.87e-06	16.48	18.95	40.36	45.53	17.715	42.945
13136	'Cd55'	-1.26263	3.76e-06	33.61	42.57	91.49	88.61	38.09	90.05
74840	'Manf'	-1.4604	3.86e-06	89.93	76.86	235.97	185.68	83.395	210.825
18824	'Plp2'	-1.29145	3.94e-06	169.6	242.99	448.61	480.17	206.295	464.39
20775	'Sqle'	-1.99762	4.66e-06	4.99	4.44	20.87	14.08	4.715	17.475
68427	'Slc39a13'	-1.2324	4.9e-06	35.56	42.16	87.45	90.64	38.86	89.045
12842	'Col1a1'	-1.51685	6.42e-06	1616.96	3116.55	6570.52	5949.25	2366.76	6259.89
16416	'Itgb3'	-1.78521	6.76e-06	3.01	5.13	12.76	13.18	4.07	12.97
18810	'Plec'	-1.33635	6.77e-06	21.52	30.03	50.78	69.64	25.775	60.21
13806	'Eno1'	-1.23226	6.77e-06	368.38	334.22	876.38	650.4	351.3	763.39
19241	'Tmsb4x'	-1.13331	7.29e-06	1199.66	1590.08	2703.01	2878.84	1394.87	2790.93
23912	'Rhof'	-2.4647	7.96e-06	1.51	0.85	6.61	7.96	1.18	7.285
66447	'Mgst3'	-1.59811	9.03e-06	27.27	37.27	99	80.31	32.27	89.655
73723	'Sh3bgrl3'	-1.1453	9.74e-06	229.19	223.85	451.53	465.36	226.52	458.445
21827	'Thbs3'	-1.1354	1.01e-05	83.14	101.46	199.62	175.84	92.3	187.73
16978	'Lrrfip1'	-1.21963	1.07e-05	25.89	33.14	62.4	68.61	29.515	65.505
12374	'Casr'	-2.93311	1.1e-05	0.3	0.87	5.34	3.33	0.585	4.335
66234	'Msmo1'	-1.99639	1.15e-05	5.2	6.41	24.29	18.43	5.805	21.36
114301	'Palmd'	-2.21753	1.16e-05	3.11	6.06	16.02	23.31	4.585	19.665
277010	'Marveld1'	-1.94155	1.24e-05	4.67	9.73	24.55	26.45	7.2	25.5
109042	'Cavin3'	-1.06003	1.31e-05	235.77	247.13	465.5	461.34	241.45	463.42
66425	'Pcp4l1'	-3.29935	1.32e-05	0.71	1.96	14.51	9.44	1.335	11.975
18793	'Plaur'	-1.92158	1.5e-05	18.59	13.93	74.38	40.01	16.26	57.195
105785	'Kdelr3'	-1.36369	1.55e-05	40.03	45.9	113.94	89.9	42.965	101.92
14230	'Fkbp10'	-1.05038	1.66e-05	109.88	111.03	198.86	225.5	110.455	212.18
217369	'Uts2r'	-1.61709	1.68e-05	13.85	20.8	45.16	52.88	17.325	49.02
75219	'Dusp18'	-1.99225	1.81e-05	1.94	3.54	10.01	10.13	2.74	10.07
99439	'Duox1'	-1.36989	2.14e-05	5.59	6.36	14.13	14.64	5.975	14.385
12444	'Ccnd2'	-1.1731	2.38e-05	24.84	30.24	62.83	52.04	27.54	57.435
100862072	'Gm21451'	-2.00226	2.5e-05	10.45	8.22	21.66	48.19	9.335	34.925
18218	'Dusp8'	-2.34093	2.73e-05	1.3	2.03	10.24	5.32	1.665	7.78
55992	'Trim3'	-1.89019	3.11e-05	3.79	5.83	14.22	18.87	4.81	16.545
326618	'Tpm4'	-1.04077	3.14e-05	152.22	152.52	309.71	270.72	152.37	290.215
64103	'Tnmd'	-1.93939	3.22e-05	35.5	99.3	268.03	204.71	67.4	236.37
19242	'Ptn'	-1.84496	3.27e-05	13.51	25.16	77.18	50.41	19.335	63.795
20166	'Rtkn'	-1.47446	3.3e-05	11.82	14.18	31.41	41.95	13	36.68
76441	'Daam2'	-1.33256	3.3e-05	6.17	7.8	16.36	16.47	6.985	16.415
68519	'Eml1'	-1.14176	3.99e-05	21.59	20.42	43.69	43.08	21.005	43.385
17181	'Matn2'	-1.10637	4.15e-05	57.21	70.55	136.55	117.66	63.88	127.105
55963	'Slc1a4'	-1.17791	4.8e-05	21.72	26.9	47.13	54.86	24.31	50.995
70445	'Cd248'	-1.45052	5.04e-05	72.35	114.43	179.62	292.84	93.39	236.23
101772	'Ano1'	-1.25764	5.56e-05	13.64	11.18	28.38	26.78	12.41	27.58
19736	'Rgs4'	-2.17257	8.13e-05	2.73	1.9	11.45	7.93	2.315	9.69
53972	'Ngef'	-1.31904	8.13e-05	37.34	52.48	84.37	123.17	44.91	103.77
17904	'Myl6'	-1.02965	8.69e-05	639.66	792.02	1388.64	1256	715.84	1322.32
83396	'Glis2'	-1.56336	9.28e-05	6.33	4.88	14.68	15.47	5.605	15.075
12825	'Col3a1'	-1.38004	9.4e-05	1262.75	2347.07	3678.09	5018.77	1804.91	4348.43
12406	'Serpinh1'	-1.22927	9.54e-05	293.27	376.57	874.08	575.89	334.92	724.985
12389	'Cav1'	-1.27727	9.86e-05	101.62	171.23	310.64	304.15	136.425	307.395
76737	'Creld2'	-1.33847	0.000103	49.12	44.24	127.62	90.3	46.68	108.96
20867	'Stip1'	-1.188	0.000103	25.8	31.48	58.9	61.81	28.64	60.355
19285	'Cavin1'	-1.00856	0.000103	469.72	616.08	1048.85	972.88	542.9	1010.87
18643	'Pfn1'	-1.05491	0.000105	410.61	397.24	852.26	687.66	403.925	769.96
12831	'Col5a1'	-1.6631	0.000112	27.22	72.95	143.01	149.69	50.085	146.35
12490	'Cd34'	-1.20865	0.000112	141.1	223.08	350.8	426.33	182.09	388.565
72349	'Dusp3'	-1.28164	0.000113	21.8	29.53	69.16	50.46	25.665	59.81
15117	'Has2'	-2.32576	0.00012	1.3	0.84	4.4	5.6	1.07	5
13121	'Cyp51'	-1.74551	0.000131	3.42	2.56	10.31	8.34	2.99	9.325
58222	'Rab37'	-2.31514	0.000133	2.44	2.32	14.31	7.86	2.38	11.085
58210	'Sectm1b'	-9.04159	0.000149	0	0	2.28	0.88	0	1.58
66894	'Wwp2'	-1.0317	0.000166	29.22	29.93	64.67	57.95	29.575	61.31
66180	'P3h4'	-1.26969	0.000169	33.18	48.27	78.61	105.82	40.725	92.215
432839	'Gprin2'	-8.93182	0.00018	0	0	0.28	0.34	0	0.31
209378	'Itih5'	-1.04788	0.000223	30.41	42.04	67.11	71.84	36.225	69.475
11830	'Aqp5'	-4.78808	0.000233	0.15	0.12	2.73	4.2	0.135	3.465
74246	'Gale'	-2.02218	0.000236	3.97	4.49	16.14	16.24	4.23	16.19
263803	'Pkn3'	-1.74282	0.000243	5.52	11.8	30.68	24.69	8.66	27.685
94352	'Loxl2'	-1.51497	0.000243	4.57	5.24	10.11	16.01	4.905	13.06
100233208	'Gm10778'	-5.9621	0.000245	0.01	0.03	0.47	1.49	0.02	0.98
67399	'Pdlim7'	-1.15307	0.000265	40.08	37.89	91.2	72.36	38.985	81.78
19221	'Ptgfrn'	-1.3618	0.000269	3.84	4.19	9.2	9.95	4.015	9.575
18383	'Tnfrsf11b'	-1.04386	0.000271	46.63	49.97	101.49	82.98	48.3	92.235
433904	'Ociad2'	-1.34645	0.000295	17.38	16.09	46.49	32.26	16.735	39.375
72393	'Faim2'	-1.78057	0.000318	3.21	6.29	18.32	11.75	4.75	15.035
66214	'Rgcc'	-1.38275	0.000319	255.23	227.37	754.57	398.75	241.3	576.66
21877	'Tk1'	-3.14117	0.000347	0.91	1.41	9.29	6.82	1.16	8.055
12819	'Col15a1'	-1.64029	0.000358	4.19	9.18	20.08	18.19	6.685	19.135
12843	'Col1a2'	-1.06503	0.000411	1394.32	2175.77	3556.29	3357.19	1785.05	3456.74
12814	'Col11a1'	-1.22588	0.000425	10.26	15.38	35.28	24.26	12.82	29.77
14228	'Fkbp4'	-1.04734	0.000443	39.91	48.25	78.71	89.91	44.08	84.31
18102	'Nme1'	-1.11381	0.000464	71.35	65.06	147.75	124.88	68.205	136.315
65112	'Pmepa1'	-1.3488	0.000476	14.24	18.09	47.92	28.26	16.165	38.09
329252	'Lgr6'	-1.71032	0.00048	2.22	2.56	5.24	7.86	2.39	6.55
16000	'Igf1'	-1.03991	0.00049	21.19	25.58	49.87	39.26	23.385	44.565
234593	'Ndrg4'	-1.05188	0.000518	40.65	48.51	95.21	75.61	44.58	85.41
17760	'Map6'	-1.10989	0.000533	33.27	36.82	58.64	79.63	35.045	69.135
192156	'Mvd'	-2.46764	0.000534	1.38	1.91	7.53	9.27	1.645	8.4
56745	'C1qtnf1'	-1.08162	0.000534	37.61	53.05	79.1	98.7	45.33	88.9
12291	'Cacna1g'	-1.80272	0.000542	0.96	1.26	3.62	3.48	1.11	3.55
170441	'Slc2a10'	-1.32521	0.00055	10.62	9.43	27.04	19.59	10.025	23.315
11433	'Acp5'	-1.13364	0.00064	76.73	70.16	172.71	125.21	73.445	148.96
20348	'Sema3c'	-1.05824	0.000681	21.38	28.85	52.05	44.81	25.115	48.43
23790	'Coro1c'	-1.04346	0.000727	30.18	34.92	53.97	70.52	32.55	62.245
83554	'Fstl3'	-1.52404	0.000745	7.25	10.37	21.34	25.41	8.81	23.375
54132	'Pdlim1'	-1.11731	0.000745	40.73	47	77.07	98.85	43.865	87.96
20284	'Scrg1'	-1.57581	0.000772	23.54	34.41	95.48	64.54	28.975	80.01
378702	'Serf2'	-1.02595	0.000772	61.37	79.84	148.37	117.62	70.605	132.995
19280	'Ptprs'	-1.1249	0.000777	14.01	16.62	25.91	36.47	15.315	31.19
18605	'Enpp1'	-1.10573	0.000777	21.06	30.81	57.57	45.62	25.935	51.595
231602	'P2rx2'	-5.36473	0.000799	0	0.19	4.42	2.16	0.095	3.29
232441	'Rerg'	-1.45778	0.000818	17.02	24.02	66.66	37.32	20.52	51.99
234214	'Sorbs2'	-2.07942	0.000836	1.02	1.16	5.04	3.56	1.09	4.3
218476	'Gcnt4'	-8.6306	0.000881	0	0	0.34	0.69	0	0.515
433938	'Mn1'	-1.08026	0.000881	12.42	18.04	28.79	30.89	15.23	29.84
26364	'Adgre5'	-1.35806	0.000912	15.41	18.57	28.97	51.65	16.99	40.31
216858	'Kctd11'	-1.50939	0.000922	11	7.26	19.59	28.88	9.13	24.235
213696	'Duoxa1'	-1.47457	0.000954	13.56	23.52	41.78	52.96	18.54	47.37
26968	'Islr'	-1.01449	0.00102339	338.7	521.13	833.9	765.61	429.915	799.755
56013	'Srcin1'	-4.98801	0.00109352	0	0.07	1.23	0.72	0.035	0.975
66815	'Mcub'	-1.16262	0.00122755	37.99	50.83	99.59	82.64	44.41	91.115
12338	'Capn6'	-1.43947	0.00122924	8.03	9	27.29	15.48	8.515	21.385
27054	'Sec23b'	-1.14695	0.00122924	13.76	18.3	32.12	33.48	16.03	32.8
12837	'Col8a1'	-1.00793	0.00122924	30.24	39.14	72.34	56.9	34.69	64.62
20692	'Sparc'	-1.17508	0.00126153	3050.65	5997.25	9564.62	9271.77	4523.95	9418.19
19725	'Rfx2'	-1.61819	0.00128502	2.95	4.63	10.02	11.49	3.79	10.755
14264	'Fmod'	-1.30425	0.00167633	816.88	1899.66	2860.33	3328.27	1358.27	3094.3
23945	'Mgll'	-1.19849	0.00172565	14.03	16.88	24.79	39.1	15.455	31.945
13400	'Dmpk'	-1.04646	0.0017324	19.62	18.93	33.69	40.25	19.275	36.97
170439	'Elovl6'	-1.55928	0.00173386	2.19	1.72	5.83	4.9	1.955	5.365
208164	'Fam180a'	-1.34741	0.00174876	30.97	45.03	112.2	65.55	38	88.875
22232	'Slc35a2'	-1.13557	0.00174876	21.27	21.6	47.59	40.66	21.435	44.125
18415	'Hspa4l'	-1.36803	0.00178637	3.08	6.02	13.6	11.76	4.55	12.68
52389	'Adgra1'	-2.74005	0.00192015	0.41	0.31	1.52	3.04	0.36	2.28
319772	'C130050O18Rik'	-1.92503	0.00192015	2.56	4.93	14.82	12.02	3.745	13.42
380842	'Stmnd1'	-8.44604	0.00203832	0	0	2.62	1.14	0	1.88
67374	'Jam2'	-1.43405	0.00217987	5.31	11.64	20.67	21.65	8.475	21.16
12322	'Camk2a'	-5.94995	0.00219669	0.02	0.02	0.32	1.3	0.02	0.81
54637	'Praf2'	-1.07323	0.00221916	53.45	77.69	120.98	132.88	65.57	126.93
407790	'Ndufa4l2'	-1.04908	0.00222273	221.24	296.17	577.13	403.05	258.705	490.09
381290	'Atp2b4'	-1.19558	0.00237997	3.63	4.05	6.35	8.24	3.84	7.295
17768	'Mthfd2'	-1.77773	0.00242823	6.06	3.27	14.6	15.26	4.665	14.93
78749	'Filip1l'	-1.71777	0.00242823	3.2	7.86	14.42	19.1	5.53	16.76
66151	'Prr13'	-1.07609	0.00246147	126.36	125.15	289.8	186.98	125.755	238.39
18029	'Nfic'	-1.01744	0.00250977	29.51	39.12	52.6	76.35	34.315	64.475
13713	'Elk3'	-1.42781	0.0025787	3.18	4.13	9.7	8.59	3.655	9.145
66628	'Thg1l'	-3.30353	0.00277629	0.11	0.77	3.5	4.36	0.44	3.93
22354	'Vipr1'	-7.68227	0.00291899	0.01	0	0.14	1.34	0.005	0.74
77125	'Il33'	-1.19753	0.00329045	24.54	23.62	37.49	65.2	24.08	51.345
63873	'Trpv4'	-1.42959	0.00336679	5.16	6.81	17.93	11.51	5.985	14.72
216197	'Ckap4'	-1.38976	0.00336679	6.01	4.79	13.99	12.29	5.4	13.14
20349	'Sema3e'	-1.05857	0.00340579	11.53	18.41	30.21	27.51	14.97	28.86
66212	'Sec61b'	-1.07646	0.00349848	127.95	140.16	287.82	223.79	134.055	255.805
107250	'Kazald1'	-1.38178	0.00355815	22.47	44.01	93.57	65.13	33.24	79.35
227541	'Camk1d'	-1.08064	0.00361401	9.56	13.87	20.33	24.66	11.715	22.495
11841	'Arf2'	-1.0844	0.00373672	27.61	24.32	59.13	43.25	25.965	51.19
26427	'Creb3l1'	-1.46166	0.00402618	5.64	7.76	14.03	20.11	6.7	17.07
116872	'Serpinb7'	-2.21482	0.00416109	1.45	5.05	14.76	12.86	3.25	13.81
106014	'Tafa5'	-2.74756	0.00421658	0.35	0.64	4.75	3.14	0.495	3.945
68588	'Cthrc1'	-2.15585	0.00436024	5.12	27.78	79.13	54.14	16.45	66.635
12161	'Bmp6'	-2.01902	0.00461212	1.12	1.41	4.7	4.79	1.265	4.745
73712	'Dmkn'	-1.51443	0.00471019	21.72	25.05	67.18	48.78	23.385	57.98
74440	'Cmip'	-1.09478	0.00471438	10.56	8.13	17.8	19.75	9.345	18.775
208624	'Alg3'	-1.36325	0.00477139	12.62	14.4	26.12	38.02	13.51	32.07
56847	'Aldh1a3'	-1.23394	0.0051587	5.96	7.03	15.8	12.48	6.495	14.14
66039	'Tmem254a'	-1.77005	0.00522973	3.22	4.71	14.07	12.49	3.965	13.28
15460	'Hr'	-1.01878	0.00561718	7.2	9.12	14.47	16.16	8.16	15.315
11651	'Akt1'	-1.18867	0.00570446	11.22	11.96	28.85	20.15	11.59	24.5
214791	'Sertad4'	-1.79169	0.00576551	2.02	3.28	11.4	5.95	2.65	8.675
140494	'Atp6v0a4'	-1.56931	0.00606414	2.77	4.84	8.58	12.24	3.805	10.41
69029	'Smdt1'	-1.11269	0.00607874	84.47	98.17	203.83	154	91.32	178.915
12097	'Bglap2'	-2.52704	0.00621864	6.08	44.87	167.89	89.23	25.475	128.56
22272	'Uqcrq'	-1.14337	0.00624767	23.16	27.12	60	42.41	25.14	51.205
69183	'C1qtnf2'	-1.12135	0.00631191	27.29	36.94	70.02	58.42	32.115	64.22
56471	'Stmn4'	-2.74819	0.00632584	0.8	1.62	9.61	5.64	1.21	7.625
19200	'Pstpip1'	-1.60458	0.00636253	5.04	9.3	18.82	22.51	7.17	20.665
66964	'Golt1b'	-1.03371	0.00648233	18.47	26.81	46.66	39.12	22.64	42.89
225362	'Reep2'	-2.64971	0.00674198	0.78	0.81	3.38	5.81	0.795	4.595
56016	'Hebp2'	-1.52557	0.00683921	7.43	7.54	25.76	14.05	7.485	19.905
21838	'Thy1'	-1.46805	0.00689561	9.07	15.88	23.56	40.11	12.475	31.835
14678	'Gnai2'	-1.05368	0.00719679	19.32	27	48.68	40.31	23.16	44.495
67112	'Fgf22'	-8.07724	0.00801861	0	0	1.38	2.59	0	1.985
18019	'Nfatc2'	-1.47661	0.00801861	2.04	1.8	4.33	6.21	1.92	5.27
20855	'Stc1'	-2.3278	0.0080992	0.53	0.58	2.94	2.23	0.555	2.585
56277	'Tmem45a'	-1.14867	0.00822225	26.69	47.87	79.84	69.16	37.28	74.5
23991	'Cib1'	-1.04215	0.00822225	33.87	38.08	68.91	68.14	35.975	68.525
109815	'Selenos'	-1.0772	0.0082492	130.92	132	328.4	181.67	131.46	255.035
13482	'Dpp4'	-1.00233	0.00886804	12.13	14.75	20.71	28.66	13.44	24.685
16512	'Kcnh3'	-8.02687	0.0089731	0	0	0.52	0.4	0	0.46
20198	'S100a4'	-1.00546	0.0089731	2295.68	3226.9	3576.91	6490.65	2761.29	5033.78
94181	'Nans'	-1.07704	0.00902885	13.9	14.59	27.74	27.89	14.245	27.815
69534	'Avpi1'	-1.15033	0.00935526	32.31	29.69	71.52	55.07	31	63.295
329941	'Col8a2'	-1.2756	0.00954503	6.26	12.1	24.29	16.89	9.18	20.59
103266	'Tmem263'	-1.30802	0.010743	8	15.81	33.59	20.73	11.905	27.16
227743	'Mapkap1'	-1.95453	0.0109359	1.15	3.91	9.98	6.58	2.53	8.28
235497	'Leo1'	-1.18424	0.0111143	9.69	8.63	21.13	17.59	9.16	19.36
244152	'Tsku'	-1.53124	0.0112199	2.77	3.72	8.51	9.02	3.245	8.765
56429	'Dpt'	-1.01725	0.0113349	68.2	122.99	161.22	195.42	95.595	178.32
16997	'Ltbp2'	-1.10224	0.0114589	26.89	40.48	46.26	88.05	33.685	67.155
18791	'Plat'	-1.35986	0.0116395	24.58	60.51	128.78	71.84	42.545	100.31
53867	'Col5a3'	-1.0335	0.0121785	12.27	15.9	20.08	33.42	14.085	26.75
68709	'Cilp2'	-1.14156	0.012266	132.28	291.34	345.29	518.52	211.81	431.905
14635	'Galk1'	-1.04182	0.0123765	18.92	19.94	37.93	35.99	19.43	36.96
14276	'Folr2'	-2.29382	0.0124875	1.82	3.88	16.25	9.57	2.85	12.91
13371	'Dio2'	-1.17035	0.012726	7.09	9.07	21.92	11.75	8.08	16.835
211389	'Suox'	-1.06831	0.0128234	10.34	12.92	21.68	23.45	11.63	22.565
72709	'C1qtnf6'	-1.10282	0.0129152	8.8	9.46	18.16	18.37	9.13	18.265
71971	'Zswim1'	-1.40709	0.0135624	4.32	4.76	8.64	13.71	4.54	11.175
64296	'Abhd8'	-1.00196	0.0148813	23.2	30.06	40.79	57.86	26.63	49.325
214922	'Slc39a2'	-6.9123	0.0153169	0.02	0	1.16	0.75	0.01	0.955
69982	'Spink2'	-2.53335	0.0154992	2.77	3.07	15.55	15.15	2.92	15.35
211949	'Spsb4'	-2.09961	0.0157922	0.98	3.12	9	7.08	2.05	8.04
72148	'Tdrp'	-6.90748	0.0162888	0	0.02	1.37	0.48	0.01	0.925
76829	'Dok5'	-2.16544	0.0163407	1.7	1.68	9.46	4.55	1.69	7.005
67883	'Uxs1'	-1.06874	0.0165184	4.64	5.86	9.65	10.76	5.25	10.205
55946	'Ap3m1'	-1.02283	0.0166979	6.5	9.99	16.34	15.51	8.245	15.925
237979	'Sdk2'	-1.55339	0.0170512	1.61	0.74	2.56	3.72	1.175	3.14
104601	'Mycbpap'	-7.85287	0.0175306	0	0	0.71	0.35	0	0.53
239447	'Colec10'	-4.48238	0.0176192	0	0.1	1.43	0.66	0.05	1.045
71884	'Chit1'	-2.08789	0.0176192	1.56	1.98	4.75	8.83	1.77	6.79
219148	'Fam167a'	-1.44342	0.0177242	3.34	2.02	6.96	6.55	2.68	6.755
17082	'Il1rl1'	-1.42191	0.0177647	2.72	4.4	8.29	9.49	3.56	8.89
66222	'Serpinb1a'	-1.31344	0.0177785	8.02	11.57	24.78	20.24	9.795	22.51
19713	'Ret'	-2.26349	0.0185928	0.3	0.24	0.99	1.53	0.27	1.26
53313	'Atp2a3'	-1.63881	0.018632	1.51	4.09	6.41	9.66	2.8	8.035
26557	'Homer2'	-1.84856	0.0187017	0.62	0.38	1.09	2.29	0.5	1.69
228576	'Mall'	-1.34467	0.0187017	6.69	5.23	14.79	13.2	5.96	13.995
56454	'Aldh18a1'	-1.07912	0.0193066	15.93	10	29.29	22.04	12.965	25.665
67139	'Mis12'	-1.16818	0.0197539	5.92	5.76	11.09	13.51	5.84	12.3
108052	'Slc14a1'	-7.86364	0.0201226	0	0	0.18	0.68	0	0.43
76282	'Gpt'	-6.80248	0.0203289	0	0.03	0.8	1.67	0.015	1.235
70361	'Lman1'	-1.00669	0.0207293	20.12	35.69	63.76	46.61	27.905	55.185
71452	'Ankrd40'	-1.29664	0.0211051	4.47	8.51	17.45	12.12	6.49	14.785
74782	'Glt8d2'	-1.459	0.0216102	6.47	19.19	28.61	36.37	12.83	32.49
68728	'Trp53inp2'	-1.0629	0.0216567	5.6	8.79	13.83	14.46	7.195	14.145
18788	'Serpinb2'	-2.83649	0.0218395	0.33	0.56	2.99	2.86	0.445	2.925
68545	'Ecscr'	-1.902	0.022206	3.19	5.08	11.89	15.61	4.135	13.75
76478	'Haus8'	-1.42429	0.023766	4.62	7.38	13.9	15	6	14.45
57170	'Dolpp1'	-1.33808	0.0251414	4.11	5.71	10.7	12.48	4.91	11.59
103733	'Tubg1'	-1.18129	0.0268046	10.1	14.95	22.29	29.32	12.525	25.805
75668	'Rasl10a'	-2.93692	0.0270383	0.61	0.84	6.26	3.77	0.725	5.015
243914	'Lgi4'	-1.6431	0.0279757	2.5	4.77	6.32	14.1	3.635	10.21
71703	'Armcx3'	-1.00775	0.0282145	9.77	16.72	25.06	24.13	13.245	24.595
59043	'Wsb2'	-1.08741	0.028433	10.2	11.14	25.07	16.88	10.67	20.975
14621	'Gjb4'	-3.11538	0.0289832	0.47	1.25	11.22	1.55	0.86	6.385
67542	'Cog6'	-1.08562	0.0291762	7.97	6.22	14.5	13.5	7.095	14
71932	'Ephx3'	-7.7317	0.0291931	0	0	0.96	0.26	0	0.61
17192	'Mbd3'	-1.34893	0.0297005	6.1	7.22	13.51	17.83	6.66	15.67
12841	'Col9a3'	-2.6935	0.0308044	0.76	2.17	15.56	1.34	1.465	8.45
15490	'Hsd17b7'	-1.72371	0.0309276	0.98	1.82	5.72	2.89	1.4	4.305
68816	'Ppil1'	-1.27659	0.0311718	10.58	9.1	21.85	22.21	9.84	22.03
320795	'Pkn1'	-1.05494	0.0316462	2.76	3.54	6.51	5.36	3.15	5.935
83921	'Cemip2'	-1.02829	0.0318868	4.94	3.47	7.65	8.33	4.205	7.99
67198	'Spats2l'	-1.13883	0.0321051	6.29	12.09	24.99	16.99	9.19	20.99
231549	'Lrrc8d'	-1.40786	0.032769	2.01	4.06	7.62	7.22	3.035	7.42
56496	'Tspan6'	-1.27411	0.032769	6.79	13.06	22.61	21.62	9.925	22.115
19260	'Ptpn22'	-1.88223	0.0339378	1.09	4.78	10.12	10.11	2.935	10.115
207259	'Zbtb7c'	-1.38677	0.0342227	1.77	3.08	5.01	6.68	2.425	5.845
21769	'Zfand3'	-1.11339	0.035127	6.28	5.98	14.69	11.5	6.13	13.095
20618	'Sncg'	-1.70152	0.0352355	6.49	8.39	20.55	23.68	7.44	22.115
19889	'Rp2'	-1.00289	0.0359431	8.8	9.57	17.34	16.62	9.185	16.98
100604	'Lrrc8c'	-1.09218	0.0363237	7.49	13.87	17.44	24.88	10.68	21.16
13717	'Eln'	-1.02454	0.0363651	6.18	10.09	16.35	14.7	8.135	15.525
109652	'Acy1'	-1.34912	0.0373515	5.78	8.01	17.41	14.95	6.895	16.18
102920	'Cenpi'	-3.75795	0.0379282	0.02	0.39	1.35	2.25	0.205	1.8
97761	'Sgsm2'	-1.31384	0.038668	2.26	3.85	7.05	6.66	3.055	6.855
102635781	'Gm38481'	-1.81351	0.0393097	2	1.35	6.89	3.99	1.675	5.44
386753	'Dbpht2'	-3.45628	0.0416652	0.12	0.1	1.45	0.81	0.11	1.13
23921	'Sh2b2'	-7.54499	0.0417842	0	0	0.54	0.39	0	0.465
14620	'Gjb3'	-4.30164	0.0418654	0	0.25	1.6	3.33	0.125	2.465
69535	'Ten1'	-1.43326	0.0420693	7.85	12.06	24.73	24.45	9.955	24.59
22153	'Tubb4a'	-1.96458	0.0422704	1.02	4.56	9.85	10.07	2.79	9.96
52009	'Jpt2'	-1.20162	0.0443811	5.86	12.76	20.15	19.28	9.31	19.715
12096	'Bglap'	-1.96754	0.0448442	8.53	43.72	114.41	65	26.125	89.705
18645	'Pfn2'	-1.254	0.0448518	7.9	9.87	13.16	26.1	8.885	19.63
84682	'Cox4i2'	-1.27851	0.0467822	19.02	23.93	57.82	37.09	21.475	47.455
269060	'Dagla'	-1.59269	0.0472279	0.98	1.46	2.11	4.65	1.22	3.38
76123	'Gpsm2'	-1.04477	0.0478853	8.9	18.41	27.24	24.82	13.655	26.03
20203	'S100b'	-1.36769	0.04867	6.26	6.79	10.81	20.41	6.525	15.61
380711	'Rap1gap2'	-1.5254	0.0488171	0.72	1.11	2.84	2.1	0.915	2.47
233405	'Vps33b'	-1.15226	0.0493448	4.73	5.2	10.95	9.49	4.965	10.22
217887	'Clba1'	-2.09527	0.0499597	0.84	1.96	3.98	7	1.4	5.49
