# Supplementary material for: Characterization of mesenchymal stem cells in pre-B acute lymphoblastic leukemia
Source: Front Cell Dev Biol. 2023 Jan 20;11:1005494. doi: 10.3389/fcell.2023.1005494 (PMC9897315; doi:10.3389/fcell.2023.1005494)
Supplement: Supplementary file 3 [file Table1.XLSX]

## Sheet: Table 1
Table 1. Upregulated genes in L-MSCs. Presented in order of significance
Gene ID	Gene Symbol	log2 (L-MSCs / Control MSCs)	Qvalue (L-MSCs / Control MSCs)	L-MSC_1 FPKM	L-MSC_2 FPKM	Control MSC_1 FPKM	Control MSC_2 FPKM	L-MSCs Average FPKM	Control MSCs Average FPKM
75750	'Slc10a6'	3.76792	2.2561e-29	47.65	39.62	2.77	3.28	43.635	3.025
226691	'Ifi207'	2.94349	4.36406e-26	52.05	45.19	5.33	6.33	48.62	5.83
56338	'Txnip'	2.65598	1.24829e-24	762.01	863.61	94.84	144.51	812.81	119.675
235320	'Zbtb16'	3.09248	2.96506e-24	25.08	19.73	2.07	2.83	22.405	2.45
21825	'Thbs1'	2.0733	2.11721e-21	210.3	185.75	44.15	43.36	198.025	43.755
27273	'Pdk4'	4.28067	9.02204e-21	118.15	126.86	9.09	2.57	122.505	5.83
78754	'Galnt15'	2.15563	8.75309e-20	180.16	142.53	32.23	36.06	161.345	34.145
17750	'Mt2'	1.88949	2.01024e-18	3170.34	2928.05	734.23	763.3	3049.2	748.765
11522	'Adh1'	3.25412	3.39799e-18	40.87	51.07	4.65	4.23	45.97	4.44
12583	'Cdo1'	2.27306	6.15129e-18	322.55	239.12	54.73	53.04	280.835	53.885
13479	'Dpep1'	3.64398	9.82267e-18	172.3	94.41	13.7	6.15	133.355	9.925
17748	'Mt1'	1.8336	1.08257e-17	4977.12	4589.33	1213.96	1218.11	4783.23	1216.04
66277	'Klf15'	3.34221	8.12451e-17	22.86	33.49	2.3	1.95	28.175	2.125
21743	'Inmt'	3.63054	4.48987e-16	301.28	242.19	29.97	10.32	271.735	20.145
57875	'Angptl4'	3.34555	5.30512e-16	296.93	161.5	28.57	13.27	229.215	20.92
74747	'Ddit4'	2.98488	1.84733e-15	41.88	62.75	6.95	5.23	52.315	6.09
50490	'Nox4'	2.11711	2.06886e-15	79.14	71.09	13.9	18.21	75.115	16.055
16009	'Igfbp3'	2.75424	3.54926e-15	39.31	67.32	7.56	7.05	53.315	7.305
18619	'Penk'	2.39587	6.26984e-15	355.39	276.51	66.83	44.3	315.95	55.565
22436	'Xdh'	2.40615	8.39802e-15	118.86	73.82	19.72	16.41	96.34	18.065
12266	'C3'	2.5769	1.0329e-14	742.18	369.22	89.66	89.76	555.7	89.71
17342	'Mitf'	2.89879	1.09037e-14	22.95	14.61	2.06	2.64	18.78	2.35
20716	'Serpina3n'	2.59653	1.58275e-14	515.09	264.22	63.63	56.17	389.655	59.9
12628	'Cfh'	2.03179	2.94311e-14	542.55	465.77	135.47	93.5	504.16	114.485
237860	'Ssh2'	2.1984	1.68212e-13	19.84	14.59	3.46	3.48	17.215	3.47
93695	'Gpnmb'	1.85986	1.02256e-12	401.61	286.34	86.78	89.64	343.975	88.21
20393	'Sgk1'	1.70638	1.0556e-12	717.59	594.85	198.98	173.25	656.22	186.115
16880	'Lifr'	1.98737	2.01579e-12	23.44	33.81	7.23	6.91	28.625	7.07
69635	'Dapk1'	2.28384	2.79128e-12	30.8	25.38	6.45	4.34	28.09	5.395
11303	'Abca1'	1.67316	1.35035e-11	26.24	24.5	7.11	7.69	25.37	7.4
68487	'Tmem140'	1.82364	2.86776e-11	108.87	108.97	31.74	23.87	108.92	27.805
29811	'Ndrg2'	1.80548	5.26343e-11	144.65	133.11	41.36	31.97	138.88	36.665
17385	'Mmp11'	3.14586	6.96095e-11	229.77	77.59	20.3	11.64	153.68	15.97
12660	'Chka'	2.51723	8.31318e-11	14.68	15.15	1.98	2	14.915	1.99
60599	'Trp53inp1'	2.56659	1.09868e-10	27.48	26.04	5.68	2.71	26.76	4.195
20363	'Selenop'	1.63864	1.09868e-10	840.48	636.98	228.69	211.62	738.73	220.155
100702	'Gbp6'	2.24507	2.79977e-10	13.87	13.83	2.55	2.89	13.85	2.72
97998	'Deptor'	1.66717	3.36681e-10	18.82	20.92	5.97	5.65	19.87	5.81
20717	'Serpina3m'	3.1051	4.40057e-10	22.13	17.7	1.88	2.39	19.915	2.135
140742	'Sesn1'	1.66714	7.4067e-10	58.49	65.77	16.89	18.15	62.13	17.52
59027	'Nampt'	1.97281	8.71926e-10	43.62	33.27	10.49	7.73	38.445	9.11
16956	'Lpl'	2.31832	1.25446e-09	58.78	40.76	11.98	6.58	49.77	9.28
241274	'Pnpla7'	2.9653	3.23728e-09	6.79	5.94	0.64	0.86	6.365	0.75
217258	'Abca8a'	1.813	3.8469e-09	53.56	48.21	11.15	16.6	50.885	13.875
15040	'H2-T23'	1.45043	5.46776e-09	353.74	336.12	124.95	108.06	344.93	116.505
56448	'Cyp2d22'	2.26257	6.46952e-09	37.36	29.72	4.87	8.14	33.54	6.505
78787	'Usp54'	2.15626	9.38733e-09	14.13	12.24	3.27	1.83	13.185	2.55
101488	'Slco2b1'	2.42428	1.33448e-08	12.12	10.63	2.39	1.7	11.375	2.045
14229	'Fkbp5'	2.31679	2.06881e-08	21.94	14.54	2.82	4	18.24	3.41
65963	'Tmem176b'	2.25272	2.11759e-08	476.95	241.33	86.77	53.52	359.14	70.145
105171	'Arrdc3'	1.39687	4.6649e-08	146.62	193.29	63.63	57.62	169.955	60.625
14594	'Ggta1'	1.46998	5.60178e-08	46.7	54.21	16.73	16.87	50.455	16.8
14219	'Ccn2'	1.27614	6.18534e-08	1496.99	1357.2	496.65	597.37	1427.1	547.01
12609	'Cebpd'	2.65734	6.95162e-08	14.69	21.36	2.04	3.26	18.025	2.65
60440	'Iigp1'	2.84004	1.17375e-07	12.42	13.65	2.31	1.06	13.035	1.685
20677	'Sox4'	2.36798	1.17375e-07	17.5	14	3.76	1.92	15.75	2.84
27404	'Abca8b'	1.72662	1.40701e-07	17.11	22.54	4.18	5.46	19.825	4.82
223775	'Pim3'	1.97484	1.77344e-07	66.96	43.89	15.39	10.82	55.425	13.105
78456	'C030002A05Rik'	1.77353	1.77344e-07	0.68	0.53	0.17	0.16	0.605	0.165
72401	'Slc43a1'	2.59716	2.09281e-07	16.45	10.86	2.08	2.3	13.655	2.19
14605	'Tsc22d3'	1.49903	2.28947e-07	912.83	1241.99	290.97	420.6	1077.41	355.785
74574	'Lvrn'	3.44947	2.3028e-07	7.63	3.19	0.51	0.55	5.41	0.53
215653	'Rassf2'	2.31541	2.477e-07	9.27	8.53	1.32	2.01	8.9	1.665
66871	'Cpne8'	1.64984	3.21616e-07	52.61	48.93	18.39	17.9	50.77	18.145
16847	'Lepr'	1.31082	3.72359e-07	77.27	104.74	33.64	35.53	91.005	34.585
208104	'Mlxip'	2.14066	3.82586e-07	8.03	23.41	2.4	2.48	15.72	2.44
64899	'Lpin3'	1.68165	3.90558e-07	30.6	26.49	9.01	7.56	28.545	8.285
18803	'Plcg1'	2.11682	4.01604e-07	8.7	11.41	2.19	2.1	10.055	2.145
57435	'Plin4'	3.31959	4.57991e-07	4.08	2.69	0.21	0.41	3.385	0.31
12048	'Bcl2l1'	1.39654	5.52747e-07	95.45	80.01	29.91	32.22	87.73	31.065
233908	'Fus'	1.75829	5.71132e-07	35.94	46.26	11.02	11.29	41.1	11.155
217166	'Nr1d1'	2.11411	8.63831e-07	59.13	41.43	14.37	7.2	50.28	10.785
57436	'Gabarapl1'	1.20149	8.64297e-07	386.81	342.45	141.75	152.11	364.63	146.93
20887	'Sult1a1'	2.2454	8.89237e-07	28.09	33.5	5.56	6.62	30.795	6.09
14579	'Gem'	1.24715	9.75045e-07	226.08	205.09	89.99	78.37	215.585	84.18
20322	'Sord'	1.50249	1.26396e-06	51.18	57.87	15.98	19.67	54.525	17.825
58909	'Fam13a'	2.83481	1.58197e-06	4.95	6.63	0.95	0.55	5.79	0.75
170460	'Stard5'	1.88861	1.58413e-06	21.79	22.96	6.2	4.99	22.375	5.595
66853	'Pnpla2'	1.74172	2.79887e-06	56.74	36.62	11.53	14.46	46.68	12.995
629059	'Fam124a'	1.27119	2.95083e-06	61.99	58.56	24.48	21.87	60.275	23.175
94214	'Spock2'	2.06077	3.10627e-06	8.08	8.14	1.58	2.05	8.11	1.815
216616	'Efemp1'	1.36618	3.32344e-06	147.45	113.42	49.1	45.51	130.435	47.305
71371	'Arid5b'	1.4204	3.86387e-06	27.1	25.41	8.1	11.29	26.255	9.695
103172	'Chchd10'	3.19251	3.95703e-06	64.86	16.82	5.62	2.7	40.84	4.16
11717	'Ampd3'	1.75849	4.25175e-06	21.55	17.44	4.41	6.36	19.495	5.385
14645	'Glul'	1.19576	4.33196e-06	165.5	154.65	58.32	71.47	160.075	64.895
26897	'Acot1'	3.08423	4.36026e-06	15.59	12.31	1.01	2.05	13.95	1.53
76184	'Abca6'	2.219	4.68911e-06	17.33	17.65	4.42	2.96	17.49	3.69
50909	'C1ra'	1.29187	5.15444e-06	414.02	312.74	122.31	153.82	363.38	138.065
216505	'Pik3ip1'	1.25647	5.97455e-06	79.81	74.08	29.01	30.01	76.945	29.51
55985	'Cxcl13'	2.6989	6.03552e-06	42.26	19.6	4.11	4.74	30.93	4.425
15937	'Ier3'	1.8129	7.82181e-06	758.46	376.43	179.14	119.61	567.445	149.375
71660	'Rarres2'	1.4042	7.82181e-06	834.93	571.22	262.51	227.03	703.075	244.77
23887	'Ggt5'	2.21066	9.26835e-06	25.72	12.35	4.35	3.93	19.035	4.14
14778	'Gpx3'	1.52594	9.72807e-06	22772.9	13129.8	6628.94	4931.66	17951.4	5780.3
66058	'Tmem176a'	1.98628	9.94591e-06	225.05	111.41	47.49	30.68	168.23	39.085
20358	'Sema6a'	2.87658	1.07119e-05	2.35	2.07	0.43	0.3	2.21	0.365
18186	'Nrp1'	1.20285	1.3444e-05	28.51	29.04	11.13	12.11	28.775	11.62
67731	'Fbxo32'	1.80869	1.41641e-05	10.58	6.97	2.28	2.4	8.775	2.34
22355	'Vipr2'	1.52858	1.44001e-05	19.98	20.15	6.13	6.87	20.065	6.5
100198	'H6pd'	2.06795	1.46087e-05	23.19	12.69	5.03	2.97	17.94	4
20315	'Cxcl12'	1.36822	1.69561e-05	889.42	547.15	261.12	258.11	718.285	259.615
19414	'Rasa3'	1.30091	1.85594e-05	55.05	42.28	17.52	19.23	48.665	18.375
104776	'Aldh6a1'	1.35591	2.30622e-05	49.97	41.77	18.57	14.74	45.87	16.655
110532	'Adarb1'	1.48391	2.56644e-05	8.91	12.83	2.95	4.82	10.87	3.885
385643	'Kng2'	3.01859	2.76181e-05	29.25	14.01	3.68	1.25	21.63	2.465
242785	'Klhl21'	1.34514	2.82138e-05	35.84	30.44	10.89	13.37	33.14	12.13
115489417	'LOC115489417'	1.37641	2.85679e-05	20.63	17.87	6.98	6.82	19.25	6.9
18030	'Nfil3'	1.94325	3.20028e-05	39.21	98.24	18.3	14.07	68.725	16.185
57429	'Sult5a1'	2.56183	3.85166e-05	35.2	19.54	5.45	3.12	27.37	4.285
18414	'Osmr'	1.29724	3.98438e-05	61.82	43.38	19.37	20.51	52.6	19.94
67557	'Larp6'	2.17019	4.72099e-05	12.47	26.77	4.02	4.01	19.62	4.015
21814	'Tgfbr3'	1.08749	4.8021e-05	91.8	79.05	34.31	40.52	85.425	37.415
12702	'Socs3'	1.5001	4.92025e-05	468.81	273	145.6	98.34	370.905	121.97
15439	'Hp'	1.94056	5.65543e-05	56.19	48.07	16.61	8.45	52.13	12.53
67287	'Parp6'	1.63704	5.65543e-05	20.22	16.8	5.67	5.58	18.51	5.625
75785	'Klhl24'	1.70709	5.99368e-05	20.58	16.67	6.84	3.47	18.625	5.155
17289	'Mertk'	2.32502	6.6659e-05	8.59	5.06	0.98	1.57	6.825	1.275
20292	'Ccl11'	2.15137	6.69976e-05	89.44	59.92	21.74	9.23	74.68	15.485
12043	'Bcl2'	2.30506	6.88204e-05	11.99	7.37	2.24	1.43	9.68	1.835
23794	'Adamts5'	1.33145	6.92473e-05	50.93	46.2	22.15	13.7	48.565	17.925
16658	'Mafb'	1.4933	7.21736e-05	99.18	62.55	21.29	32.28	80.865	26.785
20272	'Scn7a'	2.59674	7.44533e-05	6.75	3.24	1.08	0.46	4.995	0.77
14114	'Fbln1'	1.01534	7.4601e-05	197.97	184.38	78.79	94.26	191.175	86.525
66412	'Arrdc4'	1.97141	8.03875e-05	10.26	20.73	2.54	2.93	15.495	2.735
14319	'Fth1'	1.20427	8.53644e-05	19620.8	12957.7	6877.15	6167.36	16289.2	6522.26
209039	'Tns2'	1.2152	8.79378e-05	52.11	43.81	16.88	21.88	47.96	19.38
53608	'Map3k6'	1.80002	9.54253e-05	8.49	7.11	2.05	2.13	7.8	2.09
76454	'Fbxo31'	1.3471	9.71639e-05	16.82	16.55	6.07	6.15	16.685	6.11
20715	'Serpina3g'	3.48143	0.000107062	15.34	6.16	1.21	0.46	10.75	0.835
15368	'Hmox1'	1.84725	0.000115406	98.77	48.04	22.69	15.2	73.405	18.945
235493	'Fam214a'	1.60829	0.000123615	17.97	15.91	6.32	3.98	16.94	5.15
18708	'Pik3r1'	1.41054	0.000130636	22.49	31.87	7.35	11.61	27.18	9.48
56615	'Mgst1'	1.19536	0.000151603	245.06	200.05	80.6	98.88	222.555	89.74
384783	'Irs2'	2.07495	0.00017663	17.74	10.81	4.6	1.71	14.275	3.155
76187	'Adhfe1'	2.96295	0.000179836	9.16	6.15	1.27	0.58	7.655	0.925
18212	'Ntrk2'	1.20305	0.00018236	20.94	16.7	8.09	7.22	18.82	7.655
109828	'C7'	2.99654	0.000199364	6.68	3.17	0.58	0.56	4.925	0.57
13614	'Edn1'	2.91413	0.000220101	8.59	7.99	0.53	1.51	8.29	1.02
16476	'Jun'	1.27928	0.000222767	390.25	273.88	153.4	100.79	332.065	127.095
11668	'Aldh1a1'	1.59206	0.000231469	29.99	22.35	9.64	7.35	26.17	8.495
24047	'Ccl19'	2.63444	0.000259779	96.52	33.01	12.71	6.52	64.765	9.615
667214	'9930111J21Rik1'	4.49695	0.000269265	1.84	1.69	0.13	0.03	1.765	0.08
13714	'Elk4'	3.05282	0.000269265	3.22	6.85	0.26	0.81	5.035	0.535
16819	'Lcn2'	2.65699	0.000293661	70.5	22.32	5.01	8.68	46.41	6.845
16362	'Irf1'	1.6642	0.000300076	93.84	57.49	29.15	15.18	75.665	22.165
22682	'Zfand5'	1.59352	0.00032274	13.07	13.18	3.73	4.33	13.125	4.03
101056232	'Gm29804'	2.36028	0.000324236	6.52	4.22	0.89	1.06	5.37	0.975
14190	'Fgl2'	1.25926	0.000334736	97.94	81.27	42.68	26.82	89.605	34.75
14456	'Gas6'	1.19398	0.000340735	1013.3	615.55	314.74	348.22	814.425	331.48
108030	'Lin7a'	2.01727	0.000358304	7.11	4.22	1.53	1.07	5.665	1.3
209692	'Dhtkd1'	3.27404	0.000364132	3.38	2	0.29	0.13	2.69	0.21
76952	'Nt5c2'	1.49152	0.000367551	19.68	16.7	7.92	4.56	18.19	6.24
12268	'C4b'	1.51982	0.000397758	372.6	171.68	70.34	107.22	272.14	88.78
214403	'Gm4788'	1.88923	0.000423022	10.26	9.58	2.77	2.2	9.92	2.485
100040462	'Mndal'	1.7697	0.000424615	12.88	13.97	4.74	3.94	13.425	4.34
22329	'Vcam1'	1.3889	0.000432332	54.74	38.06	19.86	13.08	46.4	16.47
21929	'Tnfaip3'	1.59687	0.00044325	15.51	10.36	4.51	3.48	12.935	3.995
228801	'Bpifb1'	1.84939	0.000461523	134.46	114.78	48	15.74	124.62	31.87
16601	'Klf9'	1.2303	0.0004622	27.78	37.65	14.65	11.16	32.715	12.905
14282	'Fosb'	1.69171	0.000478541	263.53	137.11	80.15	34.79	200.32	57.47
218203	'Mylip'	1.28703	0.000479971	29.84	29.06	12.78	9.6	29.45	11.19
100637	'N4bp2l1'	2.69879	0.000492668	8.88	8.15	1.65	0.78	8.515	1.215
208177	'Phldb2'	1.48405	0.000533748	10.86	8.41	2.9	3.49	9.635	3.195
70807	'Arrdc2'	1.78007	0.000566232	14.01	11.96	3.13	3.89	12.985	3.51
56437	'Rrad'	1.9266	0.000583917	27.61	27.57	9	4.39	27.59	6.695
67426	'Coq8a'	1.09832	0.000629171	51.78	52.03	24.83	20.41	51.905	22.62
16913	'Psmb8'	1.79709	0.000700062	41.91	25.79	9.6	8.45	33.85	9.025
66569	'Gdpd1'	1.97583	0.000720238	9.73	8.41	2.26	2.02	9.07	2.14
231507	'Plac8'	2.80415	0.000770373	22.88	18.02	2.73	2.72	20.45	2.725
19193	'Pipox'	5.80546	0.000772358	3.96	2	0.11	0	2.98	0.055
22695	'Zfp36'	1.5931	0.000776552	876.02	545	310.33	125.49	710.51	217.91
15982	'Ifrd1'	1.28133	0.000808564	57.41	93.57	30.86	26.46	75.49	28.66
18626	'Per1'	1.25145	0.000819978	20.44	20.17	5.95	9.61	20.305	7.78
213119	'Itga10'	1.08914	0.000849473	25.99	23.64	9.83	11.86	24.815	10.845
21898	'Tlr4'	1.2165	0.000866597	17.06	12.02	5.91	5.75	14.54	5.83
69440	'Dennd6b'	2.29062	0.000878545	4.46	2.9	0.67	0.81	3.68	0.74
74202	'Fblim1'	3.18944	0.0008815	4.77	2.2	0.27	0.46	3.485	0.365
83383	'Tfap4'	2.52501	0.00091211	8.8	5.68	0.95	1.4	7.24	1.175
13078	'Cyp1b1'	1.5857	0.000989745	53.76	32.39	18.05	8.29	43.075	13.17
217684	'Susd6'	1.47051	0.000993831	15.58	21.71	4.46	8	18.645	6.23
64817	'Svep1'	1.32039	0.00099524	17.67	11.48	4.36	6.54	14.575	5.45
16194	'Il6ra'	1.29007	0.00100673	26.16	29.87	12.71	8.51	28.015	10.61
13107	'Cyp2f2'	1.16931	0.00100673	307.51	230.96	86.23	136.36	269.235	111.295
20208	'Saa1'	2.91212	0.00108563	39.7	18.42	2.68	4.34	29.06	3.51
15936	'Ier2'	1.83406	0.00108563	77.75	217.76	51.07	24.7	147.755	37.885
14205	'Vegfd'	1.6757	0.00114711	29.82	19.71	6.51	7.48	24.765	6.995
14872	'Gstt2'	1.81807	0.00115383	47.04	24.24	9.77	10.24	35.64	10.005
15957	'Ifit1'	1.83772	0.00126153	11.45	24.13	5.45	3.71	17.79	4.58
319655	'Podxl2'	1.80037	0.00126153	11.77	14.83	3.12	4.04	13.3	3.58
55932	'Gbp3'	1.5648	0.00133748	11.01	12.76	3.59	3.93	11.885	3.76
19885	'Rorc'	2.74122	0.00137289	9.42	5.56	1.6	0.73	7.49	1.165
18616	'Peg3'	1.50738	0.00137289	14.75	8.39	4.98	2.74	11.57	3.86
12411	'Cbs'	5.16144	0.00141436	3.75	1.54	0.14	0	2.645	0.07
16948	'Lox'	1.11211	0.00143296	346.63	330.24	184.28	107.37	338.435	145.825
15950	'Ifi203'	1.7778	0.00146145	4.24	5.62	1.43	1.44	4.93	1.435
67775	'Rtp4'	1.85001	0.00154419	23.01	38.24	5.41	8.41	30.625	6.91
76901	'Jade2'	1.47085	0.00158626	6.02	7.22	2.47	1.95	6.62	2.21
15894	'Icam1'	1.67069	0.00159542	175.53	85.83	53.84	22.46	130.68	38.15
208777	'Sned1'	1.00506	0.00160058	24.09	23.6	9.06	12.98	23.845	11.02
268903	'Nrip1'	1.27553	0.00170591	4.39	5.61	2.13	2.24	5	2.185
17329	'Cxcl9'	2.89781	0.00171467	5.25	9.37	0.29	1.52	7.31	0.905
105522	'Ankrd28'	1.12887	0.001719	13.07	11.2	5.16	4.95	12.135	5.055
100861647	'Gm21104'	2.12228	0.00172101	35.61	36.86	9.07	6.22	36.235	7.645
100042555	'Gm13305'	3.21395	0.0017324	4.98	5.18	0.68	0.37	5.08	0.525
100861969	'LOC100861969'	3.21395	0.0017324	4.98	5.18	0.68	0.37	5.08	0.525
12870	'Cp'	1.36804	0.0017324	103.62	54.49	36.06	23.82	79.055	29.94
117167	'Steap4'	1.18617	0.00178346	57.82	39.16	21.95	17.69	48.49	19.82
72193	'Scaf11'	1.0262	0.00183446	12.83	12.64	5.85	5.72	12.735	5.785
12747	'Clk1'	1.09078	0.00188577	165.29	125.53	72.89	53.63	145.41	63.26
11535	'Adm'	1.65652	0.00188613	83.7	82.75	35.22	13.36	83.225	24.29
16145	'Igtp'	1.51869	0.00200691	16.36	24.98	6.54	6.78	20.67	6.66
20846	'Stat1'	1.20811	0.00232816	13.4	14.4	6.38	4.7	13.9	5.54
16158	'Il11ra2'	3.12244	0.00238157	4.98	5.23	0.71	0.38	5.105	0.545
52609	'Cbx7'	1.53863	0.0023916	9.99	15.13	3.93	4.2	12.56	4.065
227696	'Phyhd1'	2.10535	0.00240391	15.93	15.47	4.26	2.52	15.7	3.39
14269	'Fnbp1'	1.10505	0.00246814	14.22	11.88	5.62	6.04	13.05	5.83
16337	'Insr'	1.24103	0.00269406	5.06	5.08	1.96	2.04	5.07	2
24083	'Natd1'	1.56457	0.00293945	12.2	7.55	2.75	3.48	9.875	3.115
114886	'Cygb'	1.07602	0.00301841	191.58	144.89	58.58	89.98	168.235	74.28
545389	'Cep170'	1.31732	0.00311194	5.64	6.43	2.07	2.7	6.035	2.385
55990	'Fmo2'	1.58433	0.00318663	73.56	68.94	10.52	33.9	71.25	22.21
20210	'Saa3'	2.55132	0.00329045	65.31	21.05	7.73	6.09	43.18	6.91
74343	'Crtc2'	1.29394	0.00329045	16.94	16.15	7.2	5.77	16.545	6.485
20307	'Ccl8'	2.19618	0.00333317	62.75	39.87	11.89	8.44	51.31	10.165
21355	'Tap2'	1.0984	0.00333317	29.98	33.44	12.42	15.03	31.71	13.725
12738	'Cldn2'	3.62489	0.00336464	11.36	4.06	1.12	0.06	7.71	0.59
11504	'Adamts1'	1.29975	0.00367522	61.15	30.42	19.44	15.26	45.785	17.35
224014	'Fgd4'	1.71265	0.00378164	3.32	2.46	0.91	0.74	2.89	0.825
19017	'Ppargc1a'	3.01335	0.00378502	2.19	1.18	0.08	0.3	1.685	0.19
12661	'Chl1'	2.66104	0.00390716	2.77	1.07	0.39	0.18	1.92	0.285
58805	'Mlxipl'	4.03449	0.00402618	2.97	1.4	0.24	0.02	2.185	0.13
216161	'Sbno2'	1.19947	0.00402618	55.68	34.05	14.31	20.79	44.865	17.55
240726	'Slco5a1'	8.18785	0.00406412	0.24	0.29	0	0	0.265	0
380660	'Acss3'	3.77464	0.00408817	3.38	2.34	0.6	0.02	2.86	0.31
11816	'Apoe'	1.40426	0.00423699	484.31	258.26	172.81	85.23	371.285	129.02
270118	'Maml2'	1.03532	0.00433745	15.02	11.66	6.52	6.17	13.34	6.345
110557	'H2-Q6'	3.21958	0.00439315	4.31	3.84	0.63	0.21	4.075	0.42
12577	'Cdkn1c'	1.64329	0.00441728	13.74	12.98	4.43	3.53	13.36	3.98
223658	'Mroh1'	1.29829	0.00452939	8.24	7.07	3.1	2.85	7.655	2.975
74007	'Btbd11'	2.26195	0.00461374	5.48	2.27	0.72	0.74	3.875	0.73
73182	'Pear1'	1.50461	0.00468256	9.98	8.39	2.28	3.85	9.185	3.065
24110	'Usp18'	1.75764	0.00471438	16.55	30.01	4.3	8.41	23.28	6.355
109270	'Prr5'	1.49677	0.00491593	12.65	11.65	4.71	4.9	12.15	4.805
213053	'Slc39a14'	1.39414	0.00497341	12.5	6.98	3.99	4.04	9.74	4.015
16172	'Il17ra'	1.22888	0.00504609	16.99	12.34	5.88	5.77	14.665	5.825
208650	'Cblb'	1.11835	0.00515067	8.13	8.63	3.35	3.84	8.38	3.595
24135	'Zfp68'	1.10307	0.00518816	25.37	17.6	9.15	9.52	21.485	9.335
19416	'Rasd1'	1.60931	0.00523402	46.12	48.78	20.7	7.95	47.45	14.325
15951	'Ifi204'	1.09447	0.00531042	56.96	62.79	19.74	31.83	59.875	25.785
56306	'Sinhcaf'	2.93988	0.00536242	5.71	2.3	0.7	0.28	4.005	0.49
72482	'Acbd6'	2.05628	0.00536242	11.27	18.86	3.25	3.52	15.065	3.385
268534	'Sntg2'	2.81429	0.00539994	7.35	2.46	0.7	0.6	4.905	0.65
11421	'Ace'	1.19182	0.00545757	22.36	18.85	6.42	10.51	20.605	8.465
69772	'Bdh2'	1.40025	0.00551756	34.59	30.05	11.46	11.18	32.32	11.32
56857	'Slc37a2'	1.52639	0.00555527	5.68	5.83	1.84	1.87	5.755	1.855
13197	'Gadd45a'	1.82094	0.00566625	28.64	21.69	8.7	4.45	25.165	6.575
11815	'Apod'	2.73245	0.00567765	4057.3	1574.48	482.38	307.42	2815.89	394.9
57783	'Tnip1'	1.20176	0.00570446	24.72	18.89	8.15	9.42	21.805	8.785
328967	'Arhgef37'	3.36824	0.00587642	1.15	1.3	0.14	0.04	1.225	0.09
23801	'Aloxe3'	4.81991	0.0059831	1.39	0.65	0.04	0.03	1.02	0.035
226178	'Wbp1l'	1.06622	0.0059831	40.2	27.74	13.77	16.45	33.97	15.11
77128	'Crebrf'	1.12362	0.0061773	7.89	7.59	2.97	3.65	7.74	3.31
231801	'Agfg2'	1.22756	0.00625971	14.91	16.34	5.54	6.8	15.625	6.17
20493	'Slc10a1'	4.59847	0.00653933	2.78	1.93	0.08	0.09	2.355	0.085
214804	'Syde2'	1.86895	0.00678021	3.04	4.59	0.9	1.04	3.815	0.97
15944	'Irgm1'	1.26576	0.00678021	27.51	40.49	10.33	15.63	34	12.98
16625	'Serpina3c'	1.52379	0.00681574	15.7	18.07	4.63	6.37	16.885	5.5
67893	'Tmem86a'	1.38954	0.00681574	25.09	18.38	7.19	8.22	21.735	7.705
19011	'Endou'	3.21577	0.00686918	3.07	3.14	0.21	0.39	3.105	0.3
72535	'Aldh1b1'	5.59084	0.00688595	3.25	0.54	0.08	0	1.895	0.04
20411	'Sorbs1'	1.13507	0.00724684	20.56	13.05	7.47	6.9	16.805	7.185
66607	'Ms4a4d'	2.25905	0.00730454	15.74	9.03	3.34	1.46	12.385	2.4
68895	'Rasl11a'	1.71262	0.00758922	46.5	25.2	12.69	7.54	35.85	10.115
381974	'Mrgprg'	3.12518	0.0078793	3.77	4.35	0.24	0.61	4.06	0.425
16391	'Irf9'	1.14089	0.00787951	26.01	36.28	11.15	14.64	31.145	12.895
170826	'Ppargc1b'	4.82248	0.00801861	0.46	0.17	0.01	0.01	0.315	0.01
14245	'Lpin1'	1.55163	0.00801861	9.4	7.99	3.65	1.7	8.695	2.675
13653	'Egr1'	1.32486	0.00822225	1326.38	768.48	547.15	229.48	1047.43	388.315
55942	'Sertad1'	1.16109	0.00822225	179.2	99.76	60.51	55.08	139.48	57.795
68514	'Micu2'	1.87397	0.00833237	8.66	29.3	5.03	4.47	18.98	4.75
18986	'Pou2f1'	1.99968	0.0085431	1.57	0.9	0.32	0.26	1.235	0.29
18514	'Pbx1'	1.31291	0.00857838	7.91	6	2.95	1.96	6.955	2.455
20684	'Sp100'	2.06	0.00896002	4.98	8.7	0.77	1.56	6.84	1.165
68070	'Pdzd2'	1.43619	0.00919227	2.58	2.78	0.74	1.11	2.68	0.925
13447	'Doc2b'	4.38411	0.00989099	1.1	0.68	0.07	0.01	0.89	0.04
107589	'Mylk'	1.62871	0.0100758	12.75	6.98	4.82	2.5	9.865	3.66
216190	'Appl2'	1.00446	0.0101399	32.23	38.84	18.77	13.97	35.535	16.37
93704	'Pcdhgb7'	1.44754	0.0101597	8.45	8.79	3.82	2.04	8.62	2.93
99681	'Tchh'	2.80884	0.0107044	1.48	1.23	0.11	0.25	1.355	0.18
11761	'Aox1'	1.34203	0.0107044	12.59	7.94	4.08	3.4	10.265	3.74
54006	'Deaf1'	1.45221	0.0108704	14.62	21.68	4.42	8.31	18.15	6.365
94190	'Ophn1'	1.20503	0.0109873	10.29	13.74	4.32	4.87	12.015	4.595
71724	'Aox3'	6.02012	0.0115635	0.77	0.38	0.02	0	0.575	0.01
54123	'Irf7'	1.34484	0.0116395	17.93	26.53	6.81	9.25	22.23	8.03
15483	'Hsd11b1'	1.32394	0.0119023	37.5	26.31	10.5	13.11	31.905	11.805
14469	'Gbp2'	1.11285	0.0120905	27.92	33.9	10.49	16	30.91	13.245
12984	'Csf2rb2'	5.10481	0.0121552	1.18	0.47	0.05	0	0.825	0.025
17174	'Masp1'	1.62251	0.0121552	14.29	9.13	2.05	4.98	11.71	3.515
15258	'Hipk2'	1.03054	0.0124875	6.93	6.41	3.59	3.72	6.67	3.655
80859	'Nfkbiz'	1.34105	0.012735	65.59	38.45	26.57	11.88	52.02	19.225
100861727	'Gm12394'	2.30954	0.012751	1.31	1.74	0.45	0.12	1.525	0.285
13024	'Ctla2a'	3.75583	0.0134892	3.87	3.15	0.34	0.17	3.51	0.255
227446	'Relch'	1.46315	0.0135616	6.4	4.25	1.56	1.89	5.325	1.725
54396	'Irgm2'	1.49457	0.0135624	11.3	17.04	2.92	6.41	14.17	4.665
15953	'Ifi47'	2.36744	0.0139191	4.49	10.6	1.01	1.67	7.545	1.34
14066	'F3'	1.13839	0.0140186	32.76	29.49	15.21	10.97	31.125	13.09
18968	'Pola1'	2.29817	0.0144117	2.77	1.44	0.32	0.48	2.105	0.4
64945	'Cldn12'	1.8229	0.0145742	5.99	3.85	1.55	1.07	4.92	1.31
19273	'Ptpru'	1.30663	0.014953	17.14	12.23	3.62	7.46	14.685	5.54
211770	'Trib1'	1.27869	0.0149544	22.26	15.53	9.39	5.09	18.895	7.24
54153	'Rasa4'	1.75132	0.0150115	6.71	6.42	2.19	1.37	6.565	1.78
211586	'Tfdp2'	1.22952	0.0151868	4.76	5.45	2.29	1.75	5.105	2.02
18126	'Nos2'	4.33822	0.0154956	3.19	0.71	0.2	0	1.95	0.1
100705	'Acacb'	1.61431	0.0156651	4.79	2.8	1.52	0.8	3.795	1.16
19206	'Ptch1'	1.45769	0.0157409	5.36	3.13	1.52	1.37	4.245	1.445
217378	'Dnajc27'	2.33174	0.0157534	5.21	2.53	1.1	0.31	3.87	0.705
20019	'Polr1a'	1.37247	0.0159092	4.54	3.87	1.48	1.55	4.205	1.515
22361	'Vnn1'	4.65571	0.0165143	1.77	1.05	0.09	0.02	1.41	0.055
16898	'Rps2'	1.16816	0.01682	310.46	629.37	136.44	247.73	469.915	192.085
97287	'Mtmr14'	1.43104	0.0168981	14.78	18.31	3.56	7.53	16.545	5.545
67020	'Tmem88'	2.32013	0.0174471	11.06	4.9	1.76	1.23	7.98	1.495
56417	'Adar'	1.14745	0.0175892	6.1	6.75	2.55	2.85	6.425	2.7
229900	'Gbp7'	1.35128	0.0177242	5.45	8.06	2.96	1.93	6.755	2.445
73469	'Rnf38'	1.53701	0.017928	3.73	6.23	1.4	1.77	4.98	1.585
232174	'Cyp26b1'	1.3672	0.017928	6.72	4.3	2.12	1.6	5.51	1.86
11480	'Acvr2a'	1.37614	0.0180799	6.53	4.69	2.33	1.67	5.61	2
66085	'Eif3f'	1.2625	0.0180976	83.34	146.64	27.86	60.66	114.99	44.26
14178	'Fgf7'	1.11161	0.0187017	19.3	15.7	7.13	7.93	17.5	7.53
93702	'Pcdhgb5'	2.02682	0.0203975	3.34	2.29	0.83	0.47	2.815	0.65
15205	'Hes1'	2.4499	0.0204254	4.13	26.97	2.71	2.83	15.55	2.77
108058	'Camk2d'	1.14642	0.0204934	7.82	7.5	3.44	3.32	7.66	3.38
108937	'Rnf169'	1.89781	0.0205787	1.93	1.67	0.43	0.49	1.8	0.46
77057	'Ston1'	1.51811	0.0205792	4.65	4.26	1.71	1.24	4.455	1.475
319430	'C5ar2'	3.169	0.0208259	1.47	2.43	0.08	0.32	1.95	0.2
68312	'Gstm7'	3.41118	0.0211076	6.73	1.93	0.38	0.37	4.33	0.375
102278	'Cpne7'	4.22376	0.0211259	3.06	1.03	0.23	0.02	2.045	0.125
225655	'Prelid3a'	4.05844	0.0213106	1.66	0.82	0.14	0.04	1.24	0.09
98267	'Stk17b'	1.2549	0.0213956	20.3	15.51	8.96	4.94	17.905	6.95
20866	'Stim1'	1.01789	0.0216567	33.21	20.48	12.1	12.98	26.845	12.54
667962	'Zfp966'	2.43494	0.022101	2.62	3.75	1.25	0.57	3.185	0.91
20501	'Slc16a1'	1.18911	0.0225465	27.98	14.97	7.14	10.46	21.475	8.8
22041	'Trf'	1.20858	0.0225847	36.14	20.44	12.72	10.06	28.29	11.39
19219	'Ptger4'	1.40133	0.0228395	10.78	6.74	3	3.18	8.76	3.09
380912	'Zfp395'	1.26348	0.0228988	7.26	7.6	2.39	3.36	7.43	2.875
20856	'Stc2'	3.25411	0.0233307	2.09	4.8	0.5	0.17	3.445	0.335
232345	'A2m'	4.80115	0.0240198	0.97	0.29	0.04	0.01	0.63	0.025
100039848	'Gm2457'	1.69162	0.0245618	78.92	33.67	18.82	13.28	56.295	16.05
100040035	'Gm2564'	1.69162	0.0245618	78.92	33.67	18.82	13.28	56.295	16.05
20620	'Plk2'	1.57403	0.0251983	24.87	15.98	9.51	3.22	20.425	6.365
20527	'Slc2a3'	1.57255	0.0256466	6.26	5.18	2.33	1.29	5.72	1.81
19730	'Ralgds'	1.17816	0.0263832	16.07	34.29	11.17	9.34	25.18	10.255
216152	'Plppr3'	1.78974	0.026458	14.43	4.73	2.3	2.82	9.58	2.56
20440	'St6gal1'	1.27636	0.0265556	10.43	6.29	3.21	3.25	8.36	3.23
338523	'Kdm7a'	1.48905	0.0268046	2.42	2.54	0.59	1.06	2.48	0.825
11601	'Angpt2'	2.43501	0.0268661	3.75	1.61	0.34	0.58	2.68	0.46
219132	'Phf11d'	1.22399	0.0269873	12.2	16.97	4.76	6.81	14.585	5.785
244891	'Scaper'	1.28005	0.0270257	6.8	6.49	3.12	1.93	6.645	2.525
319370	'Ubald2'	1.6561	0.0271554	25.58	11.16	5.1	5.75	18.37	5.425
56706	'Ccnl1'	1.07067	0.0274159	188.19	118.24	89.73	45.67	153.215	67.7
207728	'Pde2a'	3.92206	0.0275117	1.11	0.54	0.04	0.06	0.825	0.05
211550	'Tifa'	2.24072	0.0280868	11.81	6.27	2.84	0.71	9.04	1.775
17295	'Met'	1.46043	0.0281879	3.73	2.76	1.12	1.43	3.245	1.275
235461	'Mindy2'	1.35148	0.0282885	3.55	3.95	1.83	1.25	3.75	1.54
21354	'Tap1'	1.09084	0.0285142	12.34	14.16	5.41	6.06	13.25	5.735
52685	'Cd300lg'	5.08382	0.0291762	0.67	1.89	0.07	0	1.28	0.035
235344	'Sik2'	1.06351	0.0291957	7.05	13.58	4.37	4.97	10.315	4.67
546071	'Mast3'	1.46651	0.0295856	3.47	3.65	1.43	1.06	3.56	1.245
58244	'Stx6'	1.18354	0.0296826	13.57	20.31	6.05	6.22	16.94	6.135
18198	'Musk'	1.557	0.0297873	5.55	5	1.66	1.09	5.275	1.375
217692	'Sipa1l1'	1.45966	0.0297873	2.57	2.4	0.89	0.84	2.485	0.865
16193	'Il6'	2.1158	0.0321051	46.34	16.05	10.77	2.55	31.195	6.66
18805	'Pld1'	1.08874	0.0330493	13.82	8.71	5.14	4.7	11.265	4.92
19130	'Prox1'	5.71018	0.0330881	0.37	0.19	0.01	0	0.28	0.005
99526	'Usp53'	1.22768	0.0336385	7.69	5.71	2.51	2.62	6.7	2.565
14261	'Fmo1'	1.11699	0.0341491	88.75	120.55	26.11	61.78	104.65	43.945
102193	'Zdhhc7'	1.67021	0.0341756	5.91	21.94	4.98	3.06	13.925	4.02
20928	'Abcc9'	3.78237	0.0342227	0.95	0.5	0.1	0.01	0.725	0.055
100042856	'Gm4070'	8.3114	0.0350559	0	0.54	0	0	0.27	0
667055	'Unc93a2'	4.60735	0.0351846	3.37	1.19	0.19	0	2.28	0.095
238393	'Serpina3f'	2.30705	0.0355715	6.7	2.96	1.2	0.6	4.83	0.9
100038882	'Isg15'	2.0964	0.0355715	11.94	23.69	4.03	3.54	17.815	3.785
233789	'Smg1'	1.00175	0.0355715	5.34	3.55	2.2	1.94	4.445	2.07
19734	'Rgs16'	2.47075	0.0356759	8.85	4.89	1.99	0.31	6.87	1.15
23962	'Oasl2'	1.40729	0.0361525	11.11	19.11	3.44	7.13	15.11	5.285
20810	'Srm'	1.22014	0.0363237	34.28	44.17	10.75	20.36	39.225	15.555
79565	'Mettl27'	1.73342	0.0372797	11	4.39	1.99	2.4	7.695	2.195
320924	'Ccbe1'	1.72609	0.0378294	3.17	3.41	0.52	1.33	3.29	0.925
208618	'Etl4'	1.53254	0.038668	4.5	2.29	1.17	1.07	3.395	1.12
235611	'Plxnb1'	2.19729	0.0388543	2.58	0.92	0.5	0.22	1.75	0.36
16363	'Irf2'	1.17763	0.038975	17.55	11.64	6.03	5.94	14.595	5.985
105246303	'Gm41607'	4.76979	0.0391974	0.09	0.07	0	0	0.08	0
238317	'Mideas'	1.10675	0.0392254	10.76	8.45	2.93	5.35	9.605	4.14
109700	'Itga1'	1.07282	0.0395095	7.09	10.04	4.4	3.14	8.565	3.77
29818	'Hspb7'	1.1777	0.0407249	9.92	10.61	3.87	4.54	10.265	4.205
240776	'Kcnt2'	1.50469	0.0413489	2.85	2.9	1.01	1.17	2.875	1.09
68039	'Nmb'	1.66807	0.0416521	24.43	25.99	6.88	7.62	25.21	7.25
226025	'Trpm3'	2.70779	0.0420441	0.6	1.1	0.16	0.09	0.85	0.125
545611	'Fam205a2'	3.19617	0.0420912	1.44	0.61	0.1	0.12	1.025	0.11
217262	'Abca9'	1.03142	0.0422704	11.62	16.27	4.71	7.98	13.945	6.345
16912	'Psmb9'	1.66902	0.0446663	19.44	20.18	4.78	6.46	19.81	5.62
229003	'Helz2'	1.27462	0.0447362	2.76	2.07	0.85	1.02	2.415	0.935
16855	'Lgals4'	1.47811	0.0448442	29.13	16.75	10.33	4.4	22.94	7.365
80290	'Gpr146'	2.33674	0.0448626	5.35	1.69	0.98	0.28	3.52	0.63
108767	'Pnrc1'	1.01643	0.0448745	23.97	20.69	10.64	9.83	22.33	10.235
69551	'2310022B05Rik'	1.26537	0.0450217	8.7	12.53	5.11	3.05	10.615	4.08
107815	'Scml2'	3.0056	0.0452643	1.02	0.84	0.07	0.14	0.93	0.105
394435	'Ugt1a6b'	8.15773	0.0456048	1.94	0	0	0	0.97	0
12263	'C2'	1.07417	0.0457683	17.08	12.93	6.9	6.35	15.005	6.625
320799	'Zhx3'	1.60195	0.0459714	4.02	2.96	1.27	0.87	3.49	1.07
241915	'Phc3'	1.31313	0.0460437	7.57	5.18	2.63	1.16	6.375	1.895
11910	'Atf3'	1.00202	0.0460437	222.61	114.07	92.95	63.29	168.34	78.12
239546	'Zfp647'	1.83983	0.0465832	6.08	4.18	1.21	1.53	5.13	1.37
13032	'Ctsc'	1.63961	0.0466829	12.95	6.03	4.96	1.42	9.49	3.19
170756	'Slc8b1'	1.0426	0.0470881	35.1	24.88	9.99	17.17	29.99	13.58
192775	'Kcnh6'	1.38449	0.0472279	8.37	4.98	2.25	2.51	6.675	2.38
16590	'Kit'	4.03106	0.0473634	1.52	0.26	0.1	0.01	0.89	0.055
241794	'Kcng1'	4.52569	0.0477434	0.42	0.79	0.04	0.01	0.605	0.025
244329	'Mcph1'	1.96234	0.0480526	2.7	1.9	0.69	0.56	2.3	0.625
330323	'Mindy4'	1.1968	0.048521	15.31	8.35	4.6	4.3	11.83	4.45
544971	'Bdp1'	1.17872	0.04867	2.91	2.33	1.07	1.03	2.62	1.05
16161	'Il12rb1'	3.50596	0.0488286	1.59	0.57	0.12	0.03	1.08	0.075
268860	'Abat'	1.07497	0.0492998	7.81	6.61	3.25	3.13	7.21	3.19
